# Supplementary material for: Towards objectively quantifying sensory hypersensitivity: a pilot study of the “Ariana effect”
Source: PeerJ. 2013 Aug 1;1:e121. doi: 10.7717/peerj.121 (PMC3740136; doi:10.7717/peerj.121)
Supplement: Supplemental Information 1 — The first tab (“Subjects”) reports demographics, ASQ scores, and answers to the questionnaire about diagnosis. The second tab (“Test results”) gives the reaction time in ms for each trial for each subject, followed by two columns summarizing accuracy for each subject during blocks with or without tactile stimulation. [file peerj-01-121-s001.xlsx]

## Sheet: Subjects
				self-reported diagnoses
Subject ID #	age	sex	ASQ score	ADHD	OCD	TS	other tic disorder	atopic dermatitis
1	29	Male	7	No	No	No	No	Yes
2	48	Male	5	Yes	No	No	Yes	No
3	28	Female	14	No	No	No	No	No
4	63	Female	10	No	No	No	No	No
5	61	Female	10	No	No	No	No	No
6	31	Female	7	No	No	No	No	No
7	27	Female	3	No	No	No	No	No
8	28	Male	3	No	No	No	No	No
10	30	Male	7	No	No	No	No	No
11	28	Male	1	No	No	No	No	No
12	28	Female	4	No	No	No	No	No
13	32	Male	8	No	No	No	No	No
14	34	Male	15	No	No	No	No	No
15	26	Female	9	No	No	No	No	No
16	43	Female	11	No	No	No	No	No
17	25	Male	6	Yes	No	Yes	No	Yes
18	25	Male	9	Yes	Yes	No	No	No
19	49	Male	11	No	No	No	No	No
20	30	Female	12	No	No	Yes	No	No

## Sheet: Test_results
		Off	Off	Off	Off	Off	Off	Off	Off	Off	Off	Off	Off	Off	Off	Off	Off	Off	Off	Off	Off	Off	Off	Off	Off	Off	Off	Off	Off	Off	Off	On	On	On	On	On	On	On	On	On	On	On	On	On	On	On	On	On	On
Subject ID #	Stats	1	2	3	4	5	6	7	8	9	10	11	12	13	14	15	16	17	18	19	20	21	22	23	24	25	26	27	28	29	30	31	32	33	34	35	36	37	38	39	40	41	42	43	44	45	46	47	48
1	Mean CRTstimulus.RT	647	379	527	353	375	411	302	287		466	459	434	307	456	429	454	482	447	483	368	465	455	710	393	359	360	385	367	396	365	467	415	516	318	367	405	402	336	469	394	449	398	468	461	462	392	384
2	Mean CRTstimulus.RT	916	371	392	368	364	281	329	318	299	259	215		374	399	351	290	402	381	282	376	364	337	369	386	339	327	286	315		378	406	391	404	449	379	446	366	402	368	331	482	424	412	346	358	450	349	373
3	Mean CRTstimulus.RT	484	325	429	346	405	332	445	382	323	346	442	342	311	440	334		511	488	474	397	310	430	582	408	560	441	416	431	382	343	503	431	383	413	387	451	473	428	582	356	415	358	300	409	400	418	421	408
4	Mean CRTstimulus.RT	1374	846	618	572	1029	888	990	694	597	604	828	840	1002	601	905	802	668	795	737	911	626	586	783	700	619	706	610	771	660	614	628	466	365	755	611	629	561	593	879	766	649	811	605	904	562	476	676	836
5	Mean CRTstimulus.RT	1175	863	1050	1345	773	705	738	800	836	750	832	844	639	798	681	807	739	685	654	751	619	624	555	693	663	579	595	682	615	545	761	570	690	702	821	667	617	668	665	729	615	698	654	701	674	671	626	627
6	Mean CRTstimulus.RT	901	562	626	500	428	584	506	453	374	505	584	509	414	339	405	400	393	328	310	368		286	355	458	378	348	528	376	362		471	500	586	433	483	337	487	473	332	500	454	589	335	460	382	403	492	315
7	Mean CRTstimulus.RT	550	552	483	409	481	286	432	333	394	264	378	418	468	325	418	244	466	426	368	352	446	470	348	464	492	282	381	358	397	506	361	382	423	492	429	293	338	333	635	478	412	417	560	465	449	490	458	409
8	Mean CRTstimulus.RT	682	864	484	516	497	415	421	727	721	367	495	420	360	394	381	362	391	360	365	421	364	376	336	473	444	364	303	446	378	839	419	424	561	372	447	623	467	315	326	547	445	444	411	463	394	322	384	437
10	Mean CRTstimulus.RT	1144	573	479	593	568	652	1099	341	618	611	627	512	373	456	490	451	417	485	393	432	470	538	310	556	563	397	452	515	406	484	508	617	475	376	527	558	406	450	431	598	420	598	355	432	436	507	462	450
11	Mean CRTstimulus.RT	477	329	337	315	371	316	281	311	313	211	363	327	366	270	315	241	244	358	243	348	263	255	339	345	374	305	302	277	394	279	363	323	326	419	381	237	315	300	260	300	267	289	291	315	387	336	352	286
12	Mean CRTstimulus.RT	421	450	537	398	633	332	462	466	737	642	496	437	529	467	431	395	490	656	499	476	376	419	642	439	477	462	494	417	588	487	470	537	636	440	524	381	499	650	439	422	368	918	411	567	457	531	507	442
13	Mean CRTstimulus.RT	1025	940	1850	1096	857	664	669	717	750	585	553	579	1023	555	698	553	517	737	456	612	620	536	615	469	440	605	464	488	383	474	774	526	545	562	698	595	623	586	697	612	694	610	594	581	721	547	553	527
14	Mean CRTstimulus.RT	531	403	695	366	691	355	425	399	551	424	488	388	552	424	474	460	410	438	376	334	394	367	500	409	309	271	333	531	419	395	499	452	393	483	411	355	445	618	505	387	513	416	438	412	347	374	362	461
15	Mean CRTstimulus.RT		551	510	515	588	1408	546	420	331	380	477	608	832	505	407	459	549	567	443	469	462	623	693	508	352	429	491	425	295	311	371	419	661	511	506	635	497	492	438	521	456	504	408	498	520	604	509	512
16	Mean CRTstimulus.RT	703	755	962	483	506	754	737	571	457	481	422	458	437	441	365	607	405	465	570	510	437	556	420	467	263	451	462	463	468	554	403	509	520	550	615	481	464	861	375	459	653		438	576	583	592	465	674
17	Mean CRTstimulus.RT	613	339	357	432		388	371		816	515	558	568	788	488	829	463	391	393	207		590	598	451	455	551	635	451	363	513	311	489	382	432	444	410	470		473	604	587	602	406	344	343	543	562	543	635
18	Mean CRTstimulus.RT	1071	562	466		412		542	470	479	527		391	374	343	317		458	478	397	430	455			1119	765	459	451	532	718	518	674	377	502	431	443	402		400	427	313	442	498	447	428	385	378	349
19	Mean CRTstimulus.RT	722	748	663	688	555	633	685	621	755	628	702	656	687	638	591	648	627	672	797	609	539	639	628	628	586	644	617	656	617	634	782	734	702	656	736	650	780	723	822	791	736	756	763	810	964	854	886	904
20	Mean CRTstimulus.RT	636	361	394	550	399	445	371	302	306	397	505	420	367	494	481	379	444	360	341	292	374	393	355	360	413	340	460	420	397	493	439	354	460	353	353	334	425	507	451	364	328	302	307	397	332	289	367	401
		Off=in the absence of tactile stimulation
		On=in the presence of tactile stimulation
[truncated: 164 more columns]
